# Supplementary material for: The Clubroot Pathogen (Plasmodiophora brassicae) Influences Auxin Signaling to Regulate Auxin Homeostasis in Arabidopsis
Source: PubMed Central journal article supplement (PMC4844388; doi:10.3390/plants2040726), 2013-11-27
Supplement: plants-02-00726-s001.pdf [file plants-02-00726-s001.pdf]

**Figure S1.** Gene expression patterns of selected *GH3* genes in roots according to the Arabidopsis eFP browser [31,48].

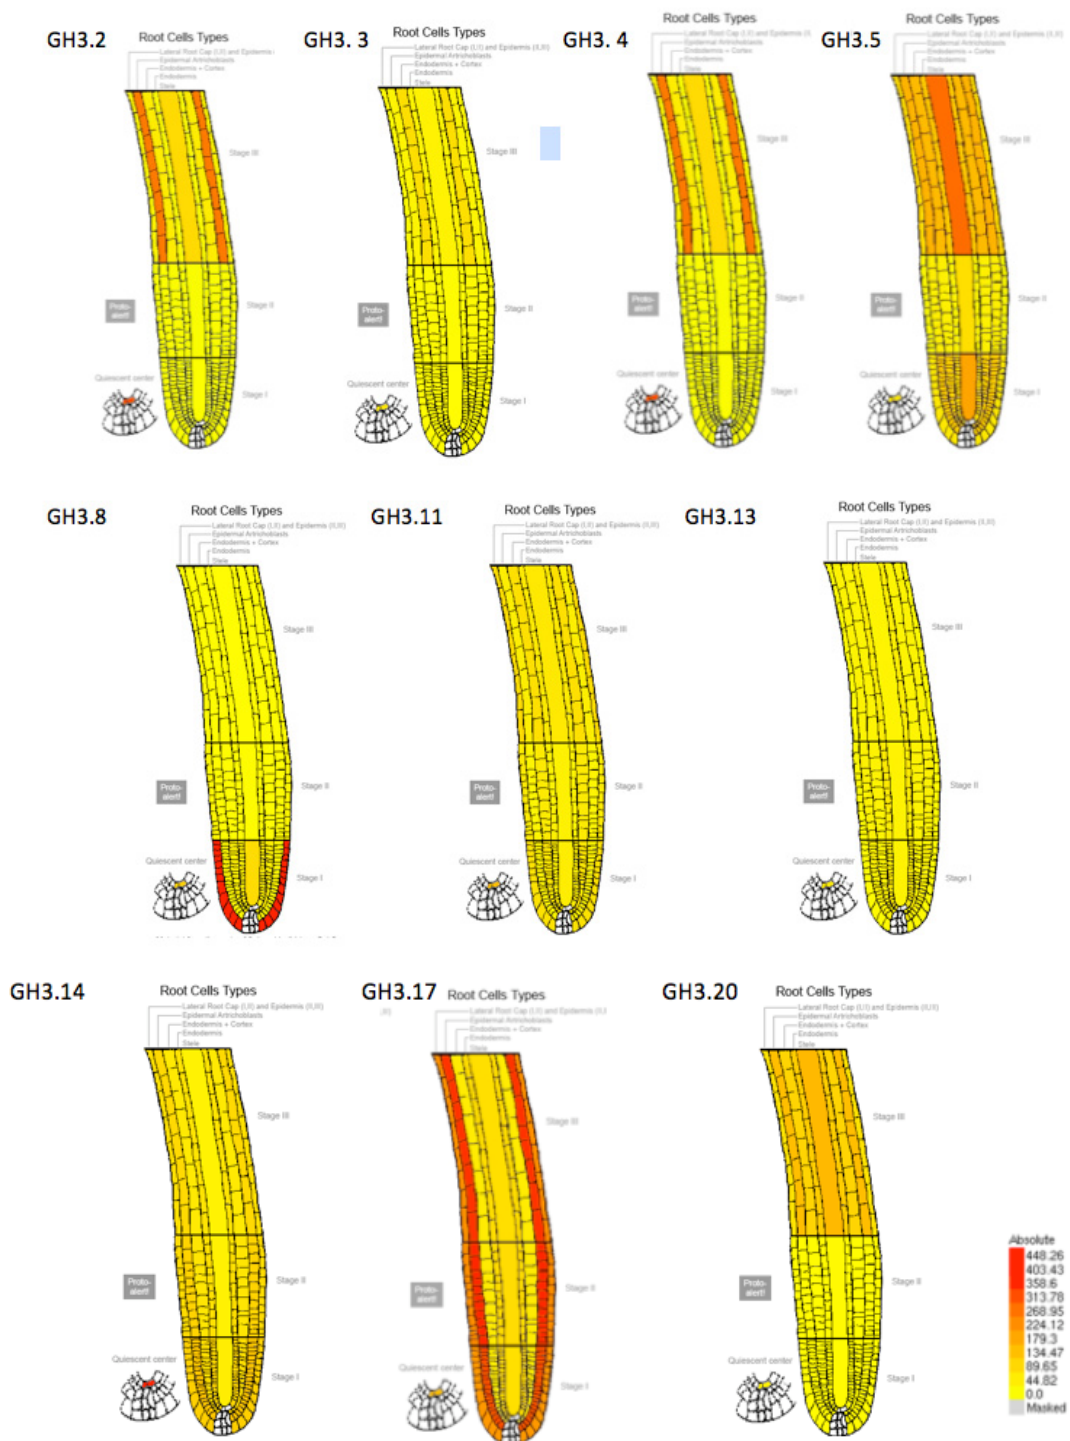

**Figure S2.** Shoot phenotype of Arabidopsis plants treated with the potassium channel inhibitor tetraethylammonium (TEA) at a concentration of 10 mM once a week. Treatment two times a week produced the same phenotype (data not shown). Pictures were taken of 42 day old plants.

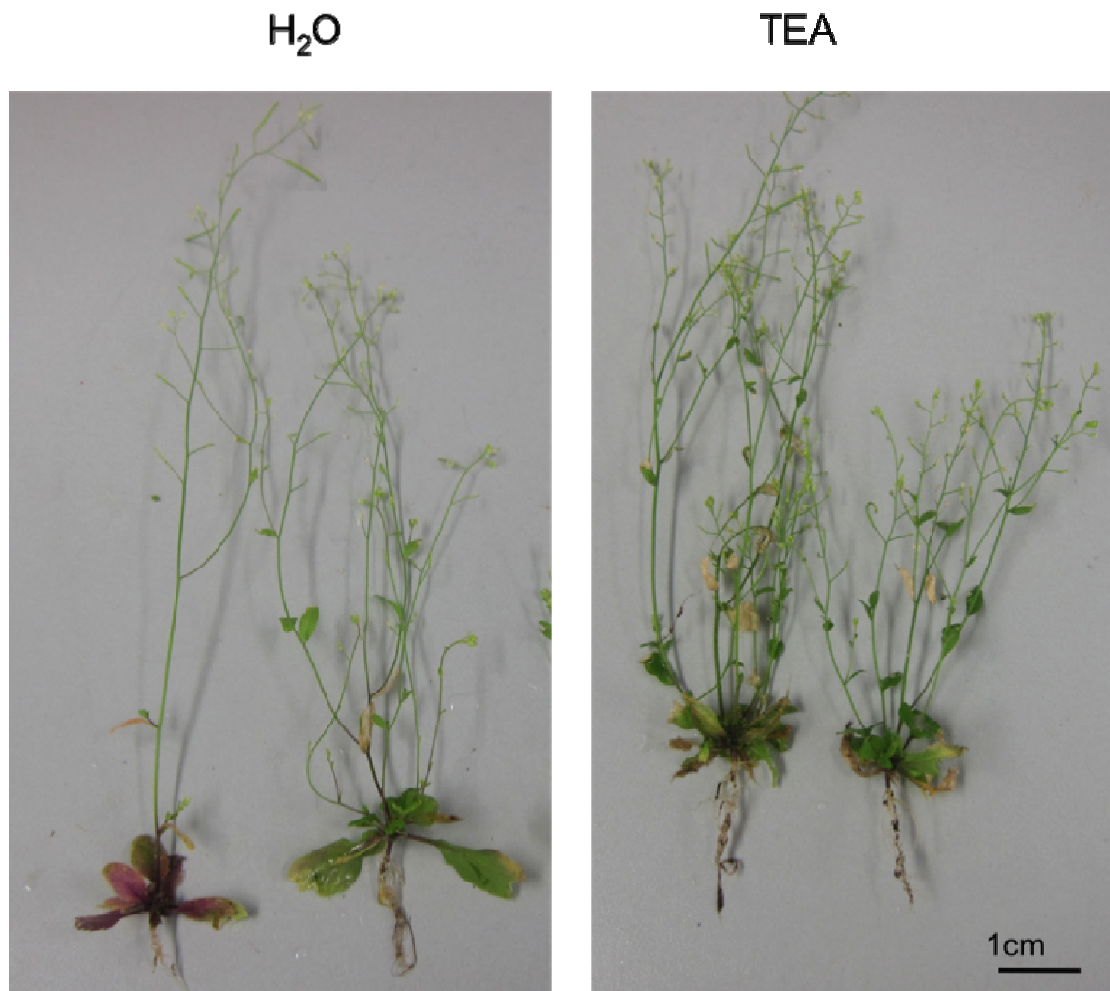

**Table S1.** Regulation of auxin receptor, *Aux/IAA* and *ARF* genes during clubroot compiled according to the microarray analysis (Arabidopsis ATH1; E-MEXP-254) by Siemens *et al.* [7]. Two time points were analyzed: At 10 days after inoculation (dai) (TP1) small secondary plasmodia of the pathogen are visible, but only about 20% of the host tissue was colonized with limited change of host cell and root morphology. At 23 dai (TP2) different developmental stages of the pathogen were present. More than 60% of the host root cells were colonized and the root morphology was drastically altered. In blue genes upregulated by  $\geq 2$ -fold are indicated, in red those downregulated by  $\leq 2$ -fold.

| Gene                                      | x-fold regulation by <i>P. brassicae</i> |        |
|-------------------------------------------|------------------------------------------|--------|
|                                           | TP1                                      | TP2    |
| <b>Receptors</b>                          |                                          |        |
| TIR1                                      | 1.24                                     | 1.87   |
| AFB1                                      | 2.60                                     | 3.33   |
| AFB2                                      | -1.08                                    | 1.05   |
| AFB3                                      | -1.03                                    | 1.77   |
| AFB4                                      | 1.41                                     | 1.06   |
| AFB5                                      | 1.48                                     | 1.38   |
| ABP1                                      | 2.06                                     | 1.85   |
| <b>Transcription repressors (Aux/IAA)</b> |                                          |        |
| IAA1                                      | 1.02                                     | -1.12  |
| IAA2                                      | -3.57                                    | -2.70  |
| IAA3                                      | -4.34                                    | -3.33  |
| IAA4                                      | 1.01                                     | -1.23  |
| IAA5                                      | -4.00                                    | -20.00 |
| IAA6                                      | -1.88                                    | -1.11  |
| IAA7                                      | -1.22                                    | 5.07   |
| IAA8                                      | -1.28                                    | -2.38  |
| IAA9                                      | -1.51                                    | -1.02  |
| IAA10                                     | -2.85                                    | -1.66  |
| IAA11                                     | 1.16                                     | -1.78  |
| IAA12                                     | 1.34                                     | -1.16  |
| IAA13                                     | -1.49                                    | -2.08  |
| IAA14                                     | 1.13                                     | 4.96   |
| IAA15                                     | not on array                             |        |
| IAA16                                     | -8.33                                    | -2.70  |
| IAA17                                     | -1.78                                    | -2.12  |
| IAA18                                     | -3.84                                    | -2.32  |
| IAA19                                     | -5.00                                    | -5.88  |
| IAA20                                     | 1.03                                     | 2.27   |
| IAA24                                     | 1.00                                     | -2.50  |

Table S1. Cont.

| Gene                                      | x-fold regulation by <i>P. brassicae</i> |        |
|-------------------------------------------|------------------------------------------|--------|
| <b>Transcription repressors (Aux/IAA)</b> |                                          |        |
| IAA26                                     | −1.85                                    | −2.32  |
| IAA27                                     | −3.70                                    | −14.28 |
| IAA28                                     | −3.12                                    | −3.70  |
| IAA29                                     | 1.16                                     | 1.30   |
| IAA30                                     | −1.23                                    | −1.25  |
| IAA31                                     | 1.20                                     | 2.30   |
| IAA32                                     | 1.76                                     | 2.53   |
| IAA33                                     | 2.85                                     | −1.22  |
| IAA34                                     | 1.39                                     | 1.71   |
| <b>Auxin response factors</b>             |                                          |        |
| ARF1                                      | −1.96                                    | −1.08  |
| ARF2                                      | −2.00                                    | −1.05  |
| ARF3                                      | 2.28                                     | 2.46   |
| ARF4                                      | 1.46                                     | −1.06  |
| ARF5                                      | −1.02                                    | −2.85  |
| ARF6                                      | −1.26                                    | −2.00  |
| ARF7 (IAA21)                              | −1.58                                    | −2.22  |
| ARF8                                      | 2.10                                     | 1.53   |
| ARF9                                      | 1.43                                     | −1.11  |
| ARF10                                     | 2.63                                     | −1.11  |
| ARF12                                     | 1.00                                     | 2.43   |
| ARF13                                     | 1.22                                     | −1.40  |
| ARF14                                     | 1.01                                     | −1.64  |
| ARF15                                     | −1.01                                    | 2.81   |
| ARF16                                     | −2.32                                    | −1.49  |
| ARF17                                     | 1.23                                     | −2.27  |
| ARF18                                     | −1.17                                    | −1.47  |
| ARF19 (ARF11, IAA22)                      | 1.31                                     | 1.37   |
| ARF20                                     | not on array                             |        |
| ARF21/ARF22 *                             | 1.00                                     | 2.43   |
| ARF23                                     | 1.52                                     | 4.25   |

\* can not be distinguished on array.

**Table S2.** Regulation of *GH3* gene expression during clubroot compiled according to the microarray analysis (Arabidopsis ATH1; E-MEXP-254) by Siemens *et al.* [7] and the Arabidopsis eFP browser [31,48] for induction by auxin. For description of the time points chosen see Table S1. In blue genes upregulated by  $\geq 2$ -fold are indicated, in red those downregulated by  $\leq -2$ -fold.

| GH3.x   | x-fold regulation by <i>P. brassicae</i> |        | Substrate | Mutant | Induction by auxin # |      |      |
|---------|------------------------------------------|--------|-----------|--------|----------------------|------|------|
|         | TP1                                      | TP2    |           |        | 30 min               | 1 h  | 3 h  |
| 1       | 2.03                                     | 1.20   |           |        | 4.6                  | 4.7  | 10.8 |
| 2       | 1.32                                     | 6.39   | IAA       | YDK1   | -1.2                 | -1.4 | -1.1 |
| 3       | 91.98                                    | 137.52 | IAA       |        | 11.0                 | 43.5 | 41.1 |
| 4       | 1.30                                     | 31.29  | IAA       |        | 20.9                 | 45.4 | 60.1 |
| 5       | -1.35                                    | 5.55   | IAA, SA   | WES1   | 2.8                  | 7.1  | 13.2 |
| 6       | 1.60                                     | -1.26  | IAA       | DFL1   | 1.8                  | 4.2  | 6.4  |
| 7       | 1.33                                     | -1.05  |           |        | -1.4                 | 1.6  | 1.0  |
| 8       | 3.05                                     | -1.35  |           |        | -1.6                 | -1.6 | -1.1 |
| 9       | 1.78                                     | -1.14  | IAA       |        | 1.1                  | -1.6 | -1.4 |
| 10      | 1.11                                     | 7.33   |           | DFL2   | 1.0                  | 1.3  | -1.6 |
| 11      | -2.00                                    | -2.22  | JA        | JAR1   | -1.2                 | -1.2 | 1.1  |
| 12      | 2.42                                     | 1.63   | BA, (SA?) | GDG1   | -2.5                 | -3.3 | 8.0  |
| 13      | 1.16                                     | 9.62   |           |        | -1.2                 | 1.3  | 1.3  |
| 14/15 * | 3.38                                     | 10.03  |           |        | 1.0                  | -1.1 | 1.0  |
| 16      | 1.42                                     | 1.44   |           |        | -1.2                 | 1.0  | 1.6  |
| 17      | 2.47                                     | 1.62   | IAA       |        | 1.0                  | -1.2 | -1.2 |
| 18      | -1.26                                    | 1.13   |           |        | -1.6                 | -5.0 | -2.0 |
| 19      | 1.32                                     | -1.23  |           |        | -5.0                 | 1.1  | 2.2  |
| 20      | 1.52                                     | -2.63  |           |        | -1.1                 | -2.5 | 1.0  |

\* can not be distinguished on array; # bar.utoronto.ca.

**Table S3.** Inducibility of *pGH3.2::GUS* and a mutated version in the auxin-response element (*mpGH3.2::GUS*). Coloring is indicated by ++, +, (+), --. Age of plants is given as days after inoculation (dai), also for mock-inoculated plants. 10 dai = 24 day old plants; 28 dai = 42 day old plants. The experiment was done three times on 10 plants for each line.

| Dai | Condition           | Plant line |             |              |
|-----|---------------------|------------|-------------|--------------|
|     |                     | wild type  | pGH3.2::GUS | mpGH3.2::GUS |
| 10  | 10 $\mu$ M IAA      | --         | ++          | --           |
|     | control             | --         | +           | --           |
|     | <i>P. brassicae</i> | --         | +           | --           |
| 28  | 10 $\mu$ M IAA      | --         | ++          | --           |
|     | control             | --         | +           | --           |
|     | <i>P. brassicae</i> | --         | ++          | (+)          |

**Table S4.** All primer sequences used in this study and the corresponding PCR conditions. The first sequence is for the forward, the second for the reverse primer. The sizes of the cDNA and, in brackets, the genomic DNA PCR products are given. \* The number of cycles sometimes varied for parallel independent experiments.

| Name of gene  | Accession number | Primer sequence (5' → 3')          | Size of PCR product | Annealing conditions (°C) / time (s) | Number of cycles * |
|---------------|------------------|------------------------------------|---------------------|--------------------------------------|--------------------|
| <i>ABP1</i>   | At4g02980        | ACT GTT GCT GGC TCC GTA TT         | 298<br>(783)        | 58 °C/45 s                           | 31–42              |
|               |                  | TAA TAG GCG GCC GAG ATA TG         |                     |                                      |                    |
| <i>AFB1</i>   | At4g03190        | ATC TCG TTC CTG ATG GTT GG         | 789<br>(981)        | 58 °C/45 s                           | 39–45              |
|               |                  | ACA CCC TCA GTT CTC GCA GT         |                     |                                      |                    |
| <i>AFB2</i>   | At4g03190        | TAC GCA GCT GAG ATT CAT GG         | 895<br>(974)        | 58 °C/45 s                           | 39–45              |
|               |                  | AAC GGA AGA CGA CCA ATC AG         |                     |                                      |                    |
| <i>ARF5</i>   | At1g19850        | CTC TCG CCA AGA TTT TCC AG         | 358<br>(546)        | 57 °C/45 s                           | 32–45              |
|               |                  | CCT TAC GCA TCC CAC AAA CT         |                     |                                      |                    |
| <i>ARF7</i>   | At5g20730        | CAT GCC TCA GCT CAT CGT AA         | 521<br>(599)        | 54 °C/45 s                           | 33                 |
|               |                  | GCG GCT AAA ACA AGA ACT CG         |                     |                                      |                    |
| <i>ARF8</i>   | At5g37020        | TCA ACA TCT GGA TTG GGT CA         | 300<br>(579)        | 57 °C/45 s                           | 42                 |
|               |                  | CGG TGT CAA TGG TTG AAG TG         |                     |                                      |                    |
| <i>ExpA17</i> | At4g01630        | TTC TCT CTA TTG GTC GCA ATG        | 752<br>(859)        | 65 °C/30 s<br>45 °C/30 s             | 16<br>16           |
|               |                  | ATC                                |                     |                                      |                    |
|               |                  | GTT AAC GTT GCT CTT GAA GCT<br>CTG |                     |                                      |                    |

|              |           |                             |              |            |       |
|--------------|-----------|-----------------------------|--------------|------------|-------|
| <i>IAA7</i>  | At3g23050 | TGA TGA CTC AGC AGA AGA CCA | 302<br>(560) | 59 °C/45 s | 42    |
|              |           | GTC CTC GTA GCT TGG CAC A   |              |            |       |
| <i>IAA28</i> | At5g25890 | TAA AGT TCT GGT CGG GGA TG  | 298<br>(654) | 51 °C/45 s | 31–38 |
|              |           | AAC CCC CGA TTT CTT AAA CG  |              |            |       |
| <i>GH3.2</i> | At4g37390 | GAA ATG ACT CGG AAC CCT GA  | 525<br>(760) | 55 °C/30 s | 30–39 |
|              |           | GCA GAG GAT GGC TTC GTT AG  |              |            |       |
| <i>GH3.3</i> | At2g23170 | AGC CTT GCC TTT GTC TAA TCC | 210          | 55 °C/30 s | 30–37 |

|                 |           |                                  |        |            |       |
|-----------------|-----------|----------------------------------|--------|------------|-------|
|                 |           | CCG GAG ATT CAA CGT ATT GC       | (800)  |            |       |
| <i>GH3.4</i>    | At1g59500 | GGT TAA CTT CAT GGC GCA TT       | 375    | 55 °C/30 s | 30–39 |
|                 |           | CTC ATC CCA TCA CCG AGT TT       | (703)  |            |       |
| <i>GH3.5</i>    | At4g27260 | TAT CTC AGG CGA CAC GAC CT       | 546    | 55 °C/30 s | 35–39 |
|                 |           | GAA TCC AGA GGC GAA GAC AG       | (806)  |            |       |
| <i>GH3.8</i>    | At5g51470 | AAC GTC CCT GTG GTG ACC TA       | 472    | 55 °C/30 s | 40    |
|                 |           | CAC CAA CCT TCA CAA CAT CG       | (700)  |            |       |
| <i>GH3.10</i>   | At4g03400 | CGA GAC GCT ACG AAG GAT TC       | 365    | 53 °C/45 s | 42    |
|                 |           | CAA GAA TCC TCC CTC CTT CC       | (540)  |            |       |
| <i>GH3.11</i>   | At2g46370 | GGA AAC GCT ACT GAC CCT GA       | 535    | 55 °C/30 s | 27–35 |
|                 |           | CGT GAA CTA GAC CGT GAG CA       | (748)  |            |       |
| <i>GH3.13</i>   | AT5g13350 | TGT CAA TCC TCT GTG CAA GC       | 692    | 55 °C/30 s | 40    |
|                 |           | CGG CTT CTT CAG TCT TCA CC       | (815)  |            |       |
| <i>GH3.14</i>   | At5g13360 | GTC ATG ATC CCG CAG AGA AT       | 674    | 55 °C/30 s | 27–30 |
|                 |           | GCT GGA ATG CAG CTC ATG TA       | (764)  |            |       |
| <i>GH3.17</i>   | At1g28130 | GCC GAA GTT GAT GCC TTC TA       | 307    | 55 °C/30 s | 27–30 |
|                 |           | ACC GCA GAG AAG CTG ACA GT       | (717)  |            |       |
| <i>GH3.20</i>   | At1g48690 | TCA CTT TTC CTT CCC CAA TG       | 366    | 55 °C/30 s | 35–40 |
|                 |           | TGA CGT CAA ATG TGA AGC AAG      | (567)  |            |       |
| <i>LTP18370</i> | At2g18370 | GCA ACA ACA AAG AAA CCC CTA      | 448    | 58 °C/30 s | 30    |
|                 |           | TTA GGA CAA GAT GGA CCA TTG<br>A | (885)  |            |       |
| <i>TIR1</i>     | At3g62980 | AGC TTA ACC GAG CTG TTC CA       | 506    | 58 °C/45 s | 32–40 |
|                 |           | GGT CAT TTG ACG GCA GAA GT       | (691)  |            |       |
| <i>YLS8</i>     | At5g08290 | AAG AGC GTC TCG TCG TCA TT       | 572    | 54 °C/45 s | 27    |
|                 |           | CGG CTT CCA AAT TTC ATT TC       | (1037) |            |       |
| <i>PbActin</i>  | AY452179  | AGC TGG CGT ACG TGG CGC AG       | 342    | 62 °C/40 s | 30    |
|                 |           | CCT TGA CGC GCA TCG ACG AC       | (342)  |            |       |
